# Supplementary material for: Metformin for Weight Loss and Metabolic Control in Overweight Outpatients With Schizophrenia and Schizoaffective Disorder
Source: Atypon-hosted journal article supplement (doi:10.1176/appi.ajp.2013.12010127), 2013-07-12
Supplement: 1032_ds001.pdf [file 1032_ds001.pdf]

 


Psychiatry Online
